# Supplementary material for: Sex Bias in Infectious Disease Epidemiology: Patterns and Processes
Source: PLOS journal article supplement (doi:10.1371/journal.pone.0062390), 2013-04-24
Supplement: S1 (10.1371/journal.pone.0062390.s001) [file journal.pone.0062390.s001]

## Sex bias in infectious disease epidemiology: patterns and processes

Felipe Guerra-Silveira and Fernando Abad-Franch

### MOOSE Checklist

**Note:** Since our appraisal of the literature was only one aspect of our hypothesis-testing exercise (which mainly relies on official incidence records), we did not perform a systematic review. Our meta-analyses are based on a selection of published papers reporting results for males and females separately; we only excluded papers with incomplete data – i.e., when a 2x2 table with positive and negative results for each sex could not be built. No report with these characteristics was excluded after assessment of its results

|                                                                                        | Reported on page | Comments                                          |
|----------------------------------------------------------------------------------------|------------------|---------------------------------------------------|
| <b>Reporting of background should include</b>                                          |                  |                                                   |
| Problem definition                                                                     | 1,3              |                                                   |
| Hypothesis statement                                                                   | 1,4-5            | See also Table 1                                  |
| Description of study outcomes                                                          | 4-7              |                                                   |
| Type of exposure or intervention used                                                  | 4-7              | Age-stratified sex differences                    |
| Type of study designs used                                                             | 7                |                                                   |
| Study population                                                                       | 4-7              |                                                   |
|                                                                                        |                  |                                                   |
| Qualifications of searchers (eg librarians and investigators)                          |                  | FA-F: MD, MSc, DLSHTM, PhD; FG-S: medical student |
| Search strategy, including time period used in the synthesis and key words             | 7                | NOTE: non-systematic searches                     |
| Effort to include all available studies, including contact with authors                | NA               | See p. 7                                          |
| Databases and registries searched                                                      | 7                |                                                   |
| Search software used, name and version, including special features used (eg explosion) | NA               | Used standard Internet searches                   |
| Use of hand searching (eg reference lists of obtained articles)                        | 7                | All references used are presented                 |
| List of citations located and those excluded, including justification                  | NA               | Only included papers were cited                   |
| Method of addressing articles published in languages other than English                | NA               | Authors fluent in English, Spanish, Portuguese    |
| Method of handling abstracts and unpublished                                           | NA               | Not used                                          |

|                                                                                                                                                                                                                                                                             |            |                                                      |
|-----------------------------------------------------------------------------------------------------------------------------------------------------------------------------------------------------------------------------------------------------------------------------|------------|------------------------------------------------------|
| studies                                                                                                                                                                                                                                                                     |            |                                                      |
| Description of any contact with authors                                                                                                                                                                                                                                     | NA         | Not done                                             |
| <b>Reporting of methods should include</b>                                                                                                                                                                                                                                  |            |                                                      |
| Description of relevance or appropriateness of studies assembled for assessing the hypothesis to be tested                                                                                                                                                                  | 7          |                                                      |
| Rationale for the selection and coding of data (eg sound clinical principles or convenience)                                                                                                                                                                                | 7          |                                                      |
| Documentation of how data were classified and coded (eg multiple raters, blinding and interrater reliability)                                                                                                                                                               | 7          | We used the data exactly as reported                 |
| Assessment of confounding (eg comparability of cases and controls in studies where appropriate)                                                                                                                                                                             | NA         | Only sex-stratified prevalence data were of interest |
| Assessment of study quality, including blinding of quality assessors, stratification or regression on possible predictors of study results                                                                                                                                  | 7          | We were interested in sex-stratified data            |
| Assessment of heterogeneity                                                                                                                                                                                                                                                 | 7-8        | Random-effects models used                           |
| Description of statistical methods (eg complete description of fixed or random effects models, justification of whether the chosen models account for predictors of study results, dose-response models, or cumulative meta-analysis) in sufficient detail to be replicated | 7-8        |                                                      |
| Provision of appropriate tables and graphics                                                                                                                                                                                                                                | Fig. 4     |                                                      |
| <b>Reporting of results should include</b>                                                                                                                                                                                                                                  |            |                                                      |
| Graphic summarizing individual study estimates and overall estimate                                                                                                                                                                                                         | NA         | Only the summary OR for each disease is reported     |
| Table giving descriptive information for each study included                                                                                                                                                                                                                | NA         |                                                      |
| Results of sensitivity testing (eg subgroup analysis)                                                                                                                                                                                                                       | Fig. 4     |                                                      |
| Indication of statistical uncertainty of findings                                                                                                                                                                                                                           | Throughout | 95%CI's provided                                     |
| <b>Reporting of discussion should include</b>                                                                                                                                                                                                                               |            |                                                      |
| Quantitative assessment of bias (eg publication bias)                                                                                                                                                                                                                       | NA         | Not a systematic review; see also Fig. 4 caption     |
| Justification for exclusion (eg exclusion of non-English language citations)                                                                                                                                                                                                | 7          | We only excluded papers with incomplete data         |
| Assessment of quality of included studies                                                                                                                                                                                                                                   | NA         | We did not make a formal assessment                  |
| <b>Reporting of conclusions should include</b>                                                                                                                                                                                                                              |            |                                                      |

|                                                                                                                          |                                            |                                                                 |
|--------------------------------------------------------------------------------------------------------------------------|--------------------------------------------|-----------------------------------------------------------------|
| Consideration of alternative explanations for observed results                                                           | Throughout                                 | We compare two main hypotheses, and discuss other possibilities |
| Generalization of the conclusions (eg appropriate for the data presented and within the domain of the literature review) | Discussion                                 |                                                                 |
| Guidelines for future research                                                                                           | Discussion                                 |                                                                 |
| Disclosure of funding source                                                                                             | 'Funding' section in the submission system |                                                                 |
